# Supplementary material
Source: HighWire-hosted journal article supplement (http://www.jrheum.org/highwire/filestream/32743/field_highwire_adjunct_files/0/170446_Data_Suppl.pdf)

## ONLINE SUPPLEMENTARY DATA

**Supplementary Figure 1.** Most anti-CitJED from double positive RA patients are cross-reactive. Anti-CitJED inhibition profiles for 15 anti-CCP2 positive (A-O; RA 1-15) and 2 anti-CCP2 negative (P-Q; RA 16-17) RA patients who expressed both anti-CitJED and anti-HomoCitJED by direct ELISA (double positive). Antibodies were inhibited by CitJED or HomoCitJED peptide at the concentrations shown. Average inhibitions of at least 2 experiments for each serum are shown  $\pm$  standard error;  $p < 0.01$  was considered significant by Two-way ANOVA; ns= not significant.

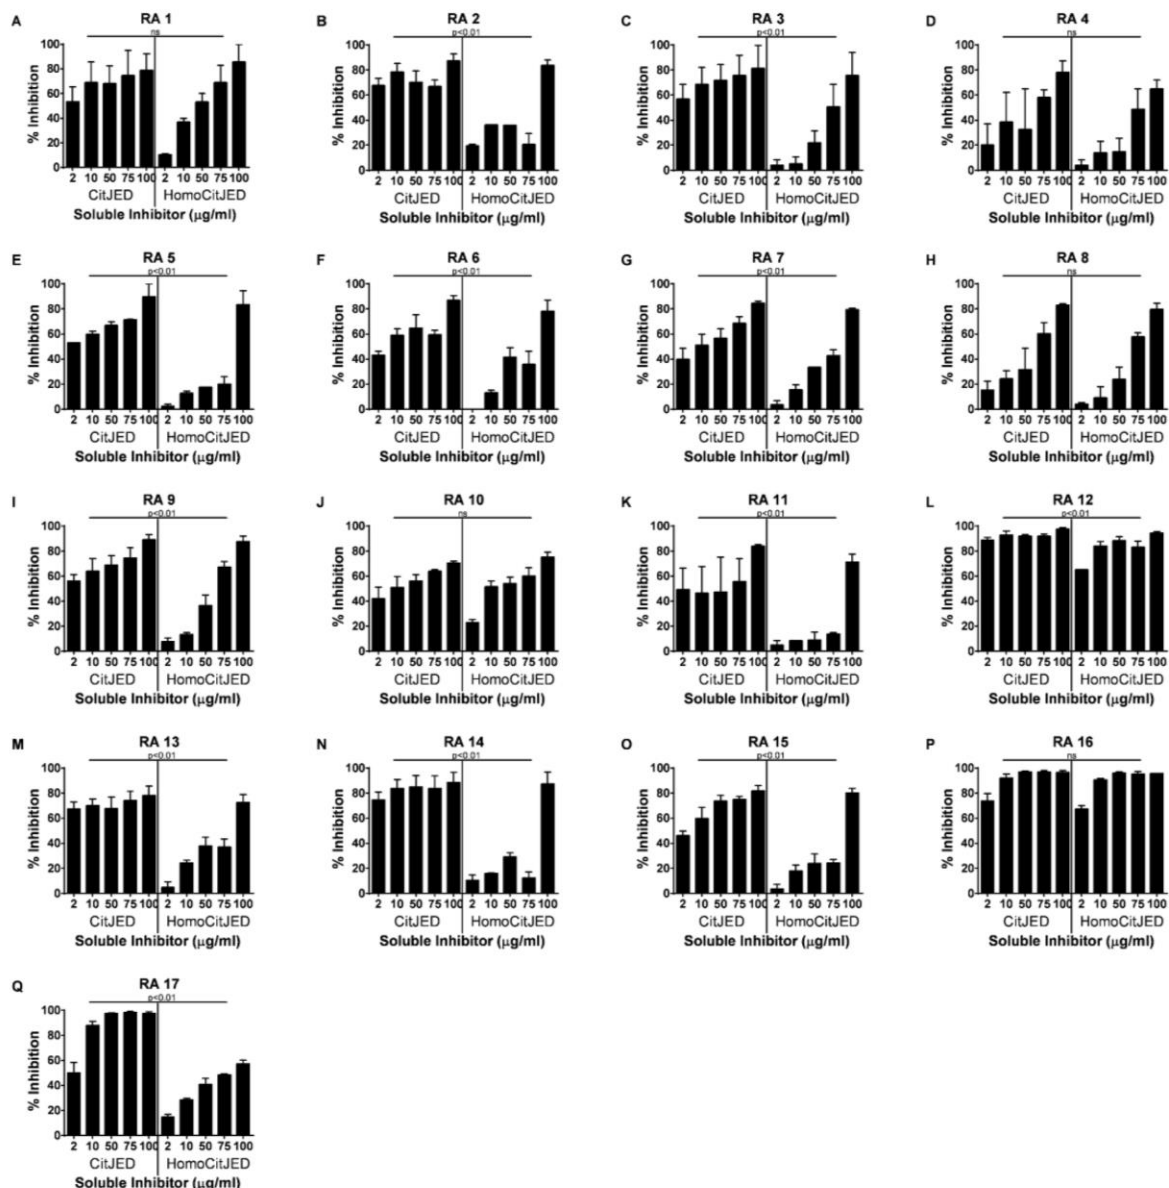

**Supplementary Figure 2.** Most anti-HomoCitJED from double positive RA patients are cross-reactive. Anti-HomoCitJED inhibition profiles for 15 anti-CCP2 positive (A-O; RA1-15) and 2 anti-CCP2 negative (P-Q; RA16-17) RA patients (same sera as in Supplementary Figure 1) who expressed both anti-CitJED and anti-HomoCitJED by direct ELISA (double positive). Antibodies were inhibited by CitJED or HomoCitJED peptide at the concentrations shown. Average inhibitions of at least 2 experiments for each serum are shown +/- standard error;  $p < 0.01$  was considered significant by Two-way ANOVA; ns= not significant.

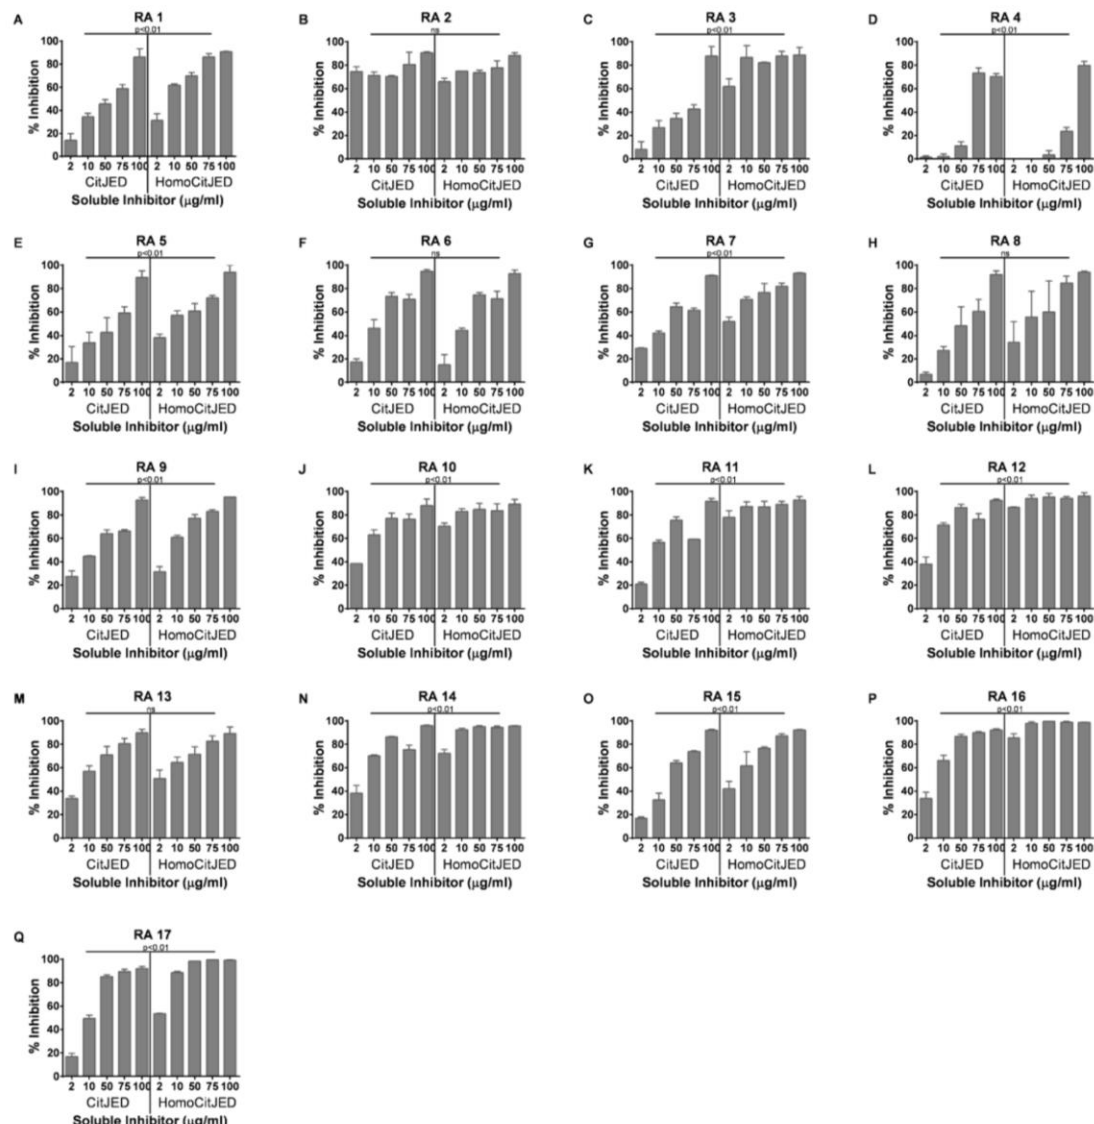

**Supplementary Figure 3.** Most anti-CitJED and anti-HomoCitJED from single positive RA patients are cross-reactive. Inhibition of anti-CitJED from 5 anti-CitJED single positive RA patients (A-E; RA 18-22). Inhibition of anti-HomoCitJED from 5 anti-HomoCitJED single positive RA patients (F-J; RA 23-27). All patients tested were positive for anti-CCP2;  $p < 0.01$  was considered significant by Two-way ANOVA; ns= not significant.

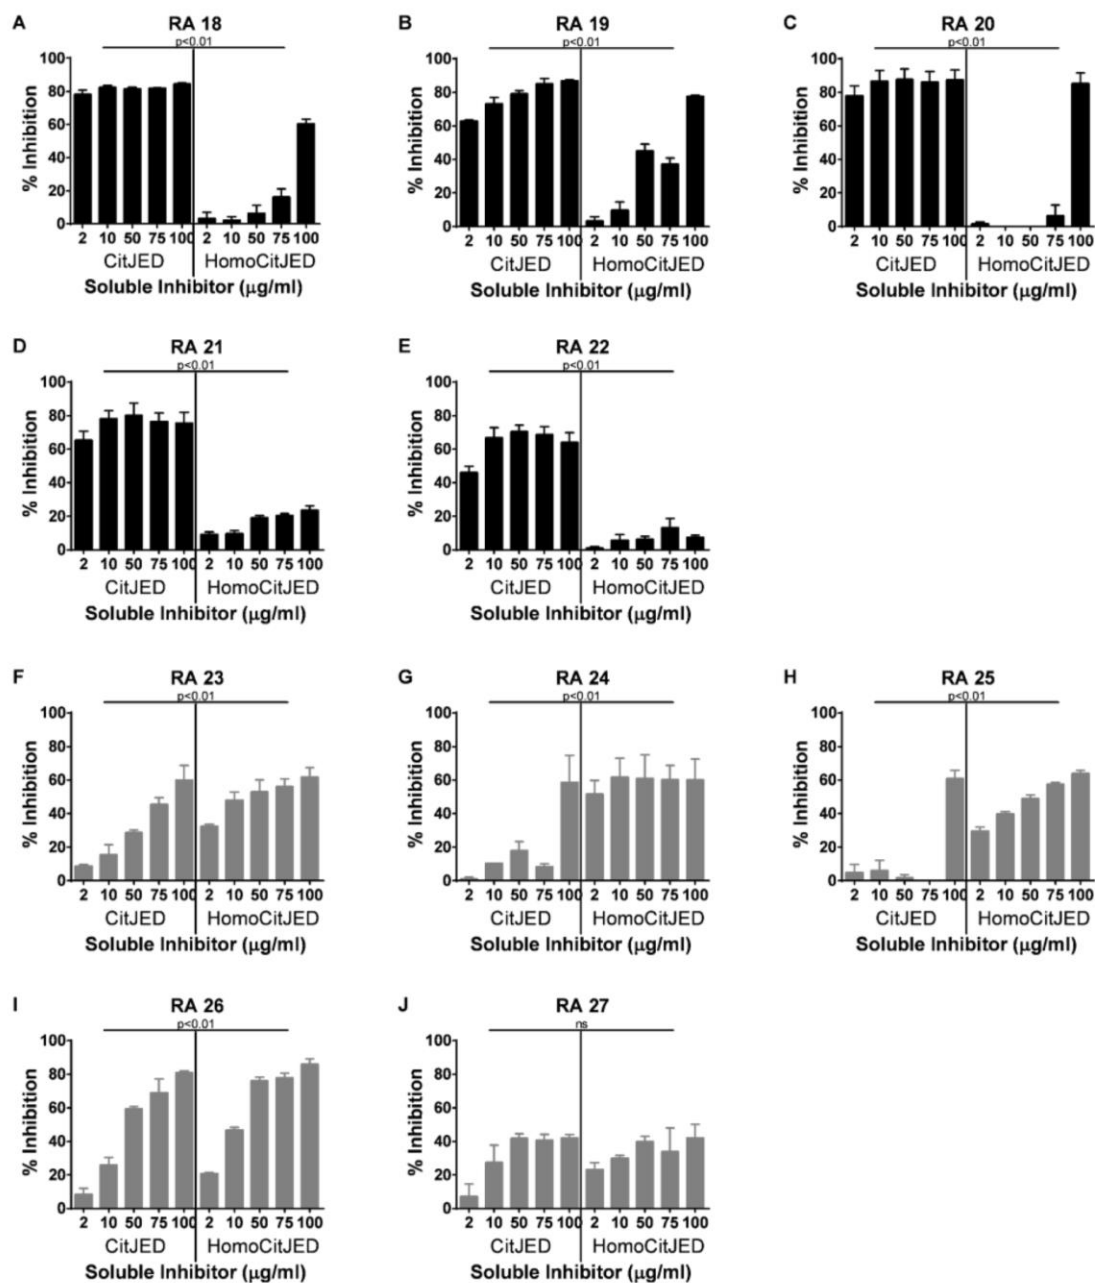

Supplement: 170446_Data_Suppl.pdf [file 170446_Data_Suppl.pdf]
